# Supplementary material for: Proteogenomic analysis dissects early-onset breast cancer patients with prognostic relevance
Source: PubMed Central journal article supplement (PMC11612404; doi:10.1038/s12276-024-01332-w), 2024-11-01
Supplement: 12276_2024_1332_MOESM1_ESM.pdf [file 12276_2024_1332_MOESM1_ESM.pdf]

Supplementary Fig. 2. Correlation between proteogenomic (PG)-based immune signatures and the cell densities (cells/mm<sup>2</sup>) for each immune marker or phenotype quantified by multiplex immunofluorescence staining. Spearman correlation coefficients are color-coded to indicate positive (red) or negative (blue) associations.

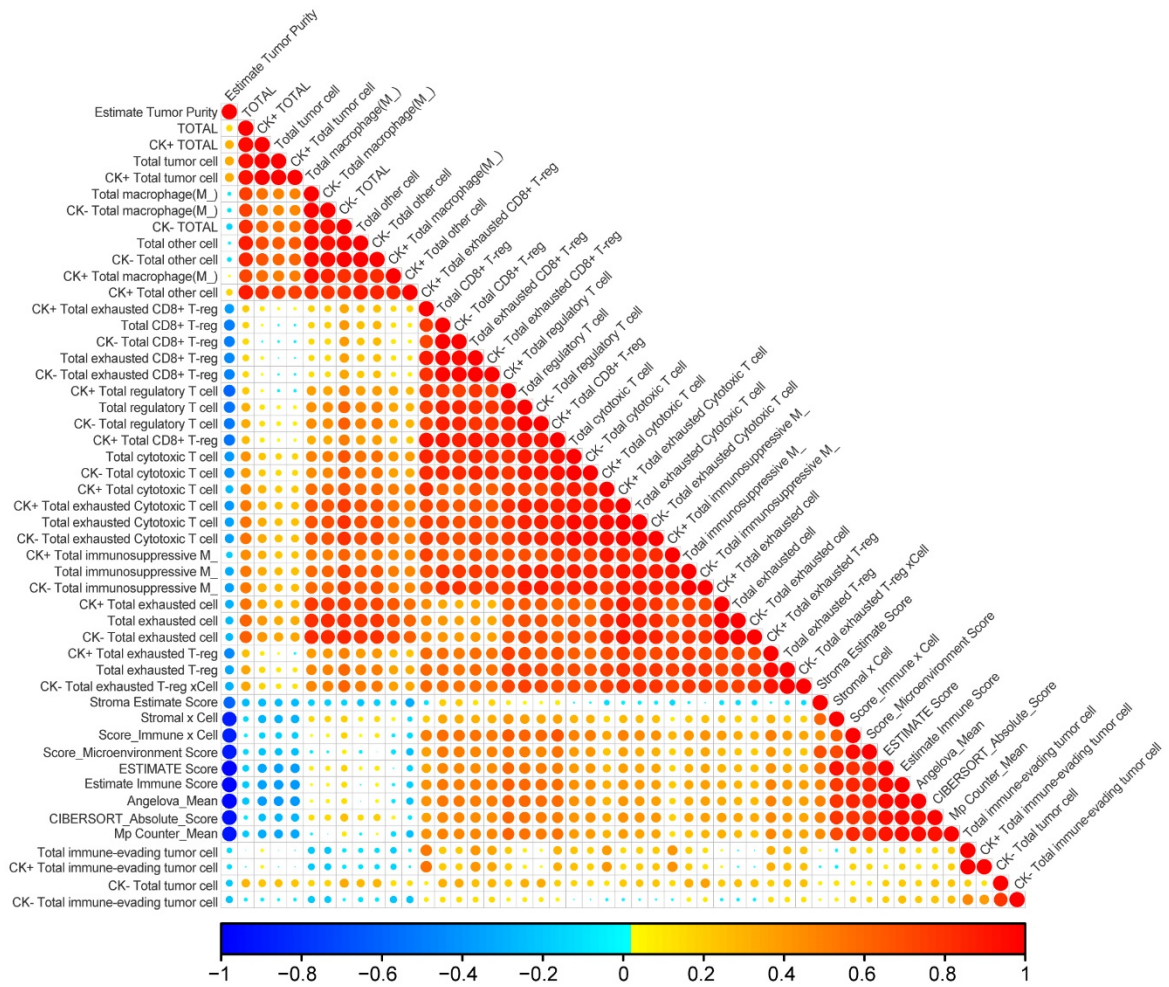

Supplementary Fig. 3. Heatmap showing the wide range of expression levels for immune-related features in each PAM50 subtype. The Z scores of RNA-based immune signatures from CIBERSORT, ESTIMATE, MCP counter, xCell, immune gene set from Angelova, as well as protein-derived signatures for immune modulator gene sets, are displayed in the top two data panels. The third data panel presents the scores for immune phenotypes, including T cells, CD8 T cells, Cytotoxic lymphocytes, B lineage, NK cells, Monocytic lineage, Myeloid dendritic cells, Neutrophils, Endothelial cells, and Fibroblasts.

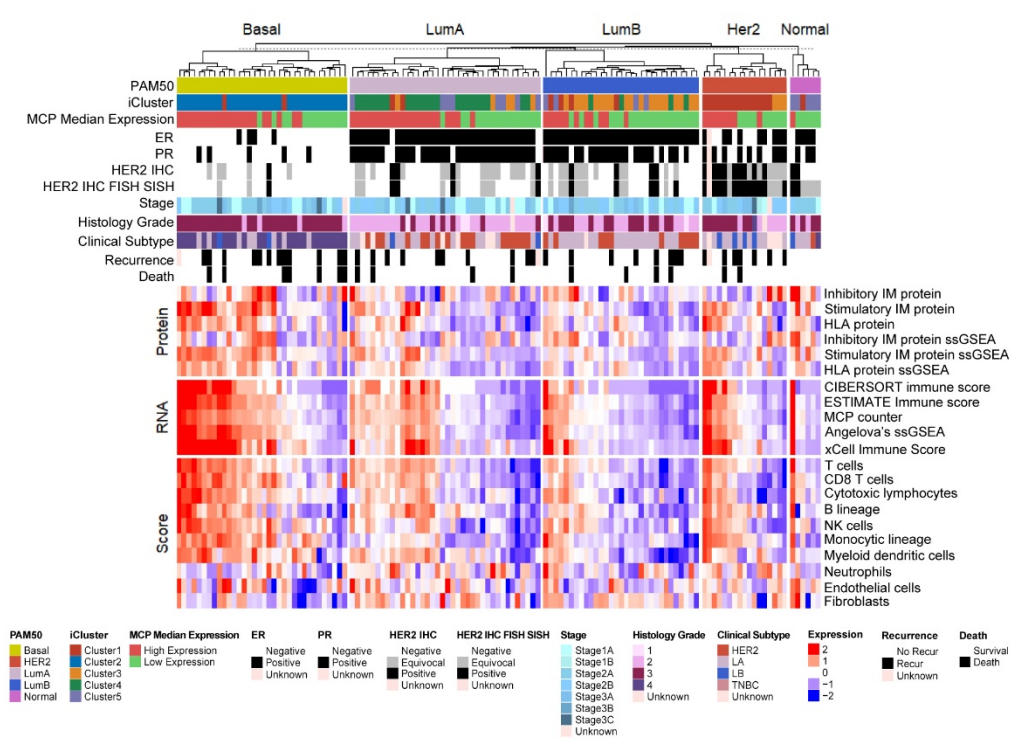

Supplementary Fig. 4. The estimated xCell immune scores in the PAM50 subtypes of the YBC cohort (ANOVA,  $P = 0.007$ ).

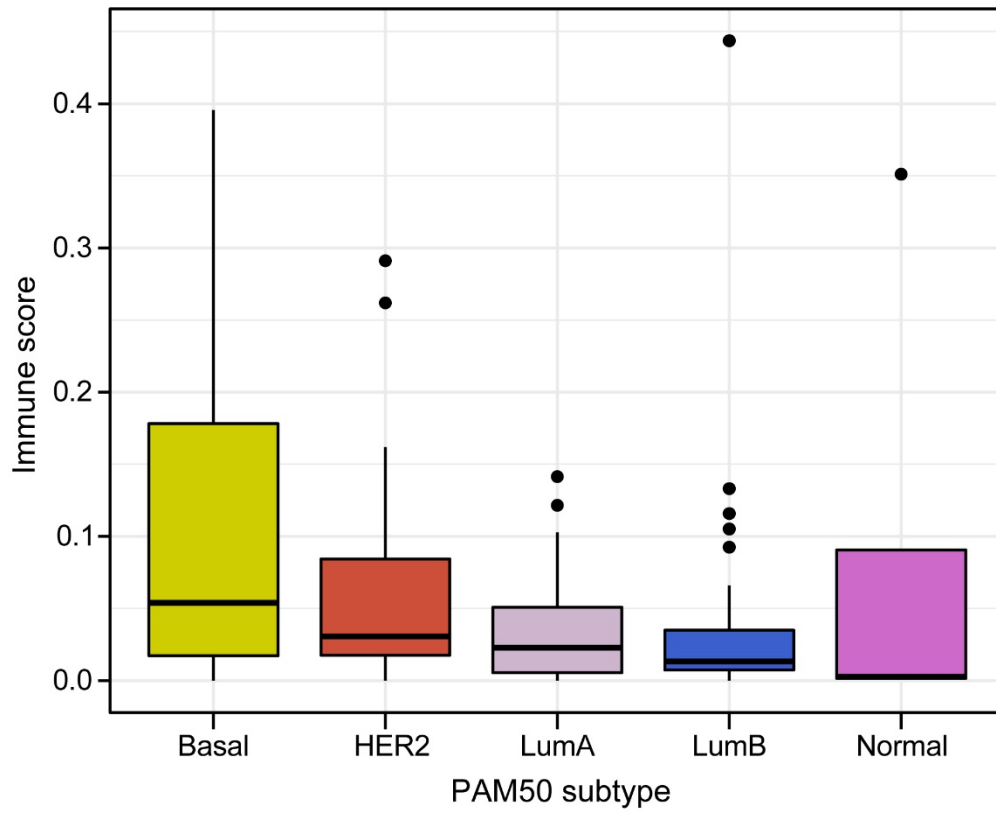

Supplementary Fig. 5. Distribution of absolute immune scores (CIBERSORT) in the YBC five integrative clusters (iClusters) (ANOVA,  $P = 0.001$ ).

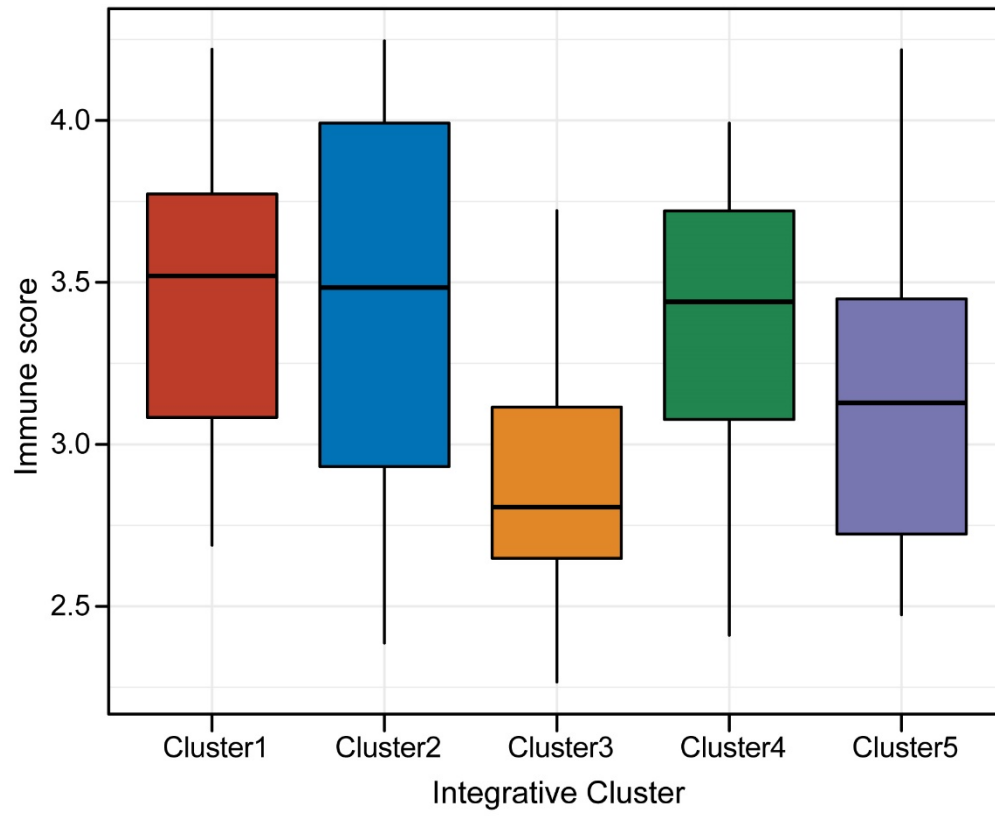

Supplementary Fig. 6. Kaplan-Meier (KM) plots showing progression free survival (PFS) based on the expression level (high vs. low) of the RNA-based immune signatures from CIBERSORT, ESTIMATE, MCP, and xCell algorithms in iCluster 3 patients. The threshold of “high” and “low” was based on the median expression level of immune signatures in iCluster 3 patients.

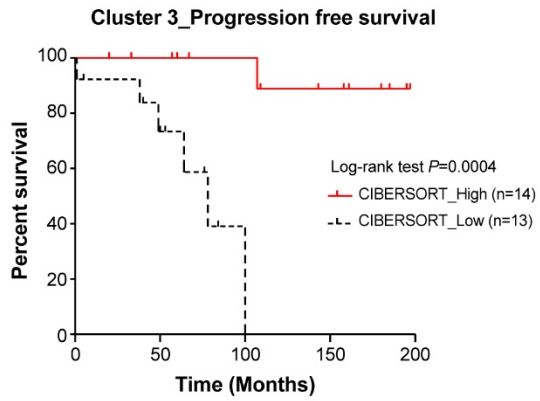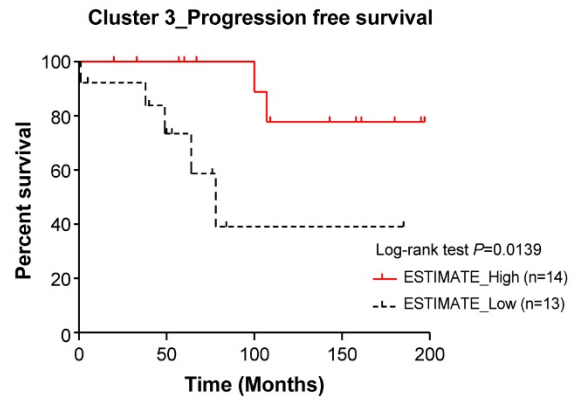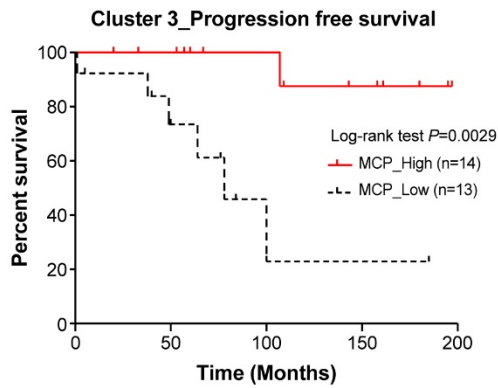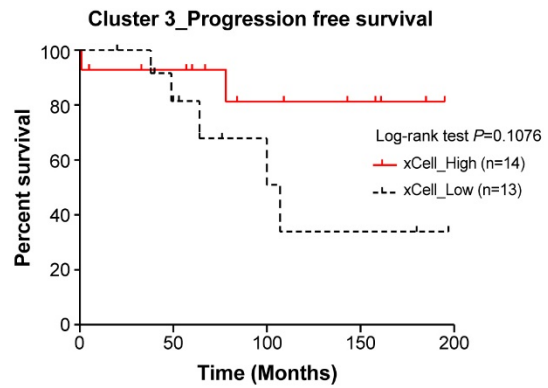

Supplementary Fig. 7. Protein-RNA correlation analysis. **a** Histogram depicting correlation between protein and RNA quantification values of individual genes. Red denotes a positive correlation between protein and RNA, while blue signifies a negative correlation. The lower panel represents the most highly correlated (top three lines) and the most uncorrelated (the bottom three lines) molecular pathways in YBC. ER: Estrogen receptor **b** KM survival curves demonstrate the predictive power of protein and RNA correlation in hormone-positive breast cancer. The subgroup with a high RNA-protein correlation shows a poorer prognosis compared to the subgroup with a low RNA-protein correlation ( $p = 0.0049$ ).

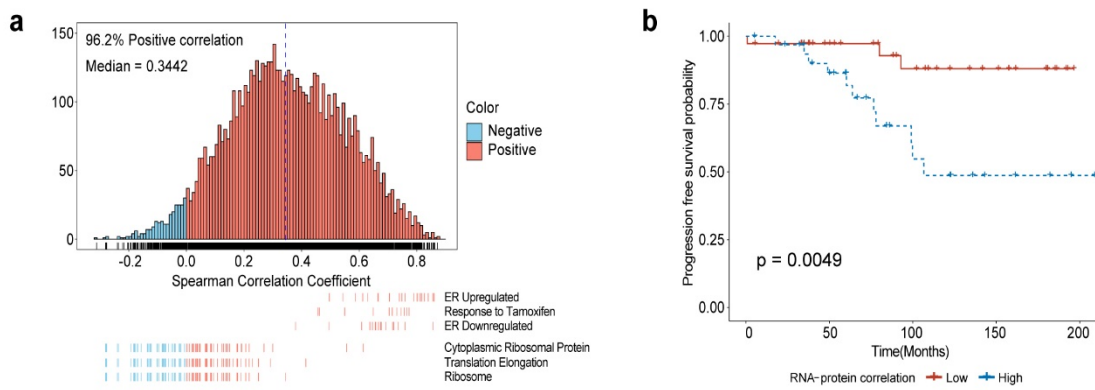

## Supplementary Table

### Supplementary Table 1. Clinical characteristics of patients with young breast cancer

| Characteristics                  | Total (N)      | Total (%) |
|----------------------------------|----------------|-----------|
| No. of patients                  | 126            | 100.00    |
| Age at diagnosis (median, range) | 37 (23-40)     |           |
| Age at diagnosis (Mean $\pm$ SD) | 35.6 $\pm$ 3.8 |           |
| T stage                          |                |           |
| T1                               | 40             | 31.7      |
| T2                               | 68             | 54.0      |
| T3                               | 15             | 11.9      |
| T4                               | 3              | 2.4       |
| N stage                          |                |           |
| N0                               | 59             | 46.8      |
| N1/N1mic                         | 49             | 38.9      |
| N2                               | 10             | 7.9       |
| N3                               | 5              | 4.0       |
| Nx                               | 3              | 2.4       |
| Stage                            |                |           |
| I                                | 27             | 21.4      |
| II                               | 76             | 60.3      |
| III                              | 20             | 15.9      |
| IV                               | 3              | 2.4       |
| HG                               |                |           |
| 1                                | 5              | 4.0       |
| 2                                | 54             | 42.9      |
| 3                                | 65             | 51.6      |
| Unknown                          | 2              | 1.6       |
| ER                               |                |           |
| Positive                         | 84             | 66.7      |
| Negative                         | 41             | 32.5      |
| Unknown                          | 1              | 0.8       |
| PR                               |                |           |
| Positive                         | 73             | 57.9      |
| Negative                         | 52             | 41.3      |
| Unknown                          | 1              | 0.8       |
| HER2                             |                |           |
| Positive                         | 25             | 19.8      |
| Negative                         | 78             | 61.9      |



|                                            |     |                  |
|--------------------------------------------|-----|------------------|
| Unknown/ Equivocal                         | 23  | 18.3             |
| <hr/>                                      |     |                  |
| Ki-67                                      |     |                  |
| <14%                                       | 43  | 34.1             |
| ≥14%                                       | 76  | 60.3             |
| Unknown                                    | 7   | 5.6              |
| <hr/>                                      |     |                  |
| Clinical subtype                           |     |                  |
| LA                                         | 33  | 26.2             |
| LB                                         | 55  | 43.7             |
| HER2                                       | 10  | 7.9              |
| TNBC                                       | 25  | 19.8             |
| Unknown                                    | 3   | 2.4              |
| <hr/>                                      |     |                  |
| Surgery                                    |     |                  |
| BCS                                        | 83  | 65.9             |
| Mastectomy                                 | 40  | 31.7             |
| Unknown                                    | 3   | 2.4              |
| <hr/>                                      |     |                  |
| Chemotherapy                               |     |                  |
| Done                                       | 113 | 89.7             |
| Not done                                   | 10  | 7.9              |
| Unknown                                    | 3   | 2.4              |
| <hr/>                                      |     |                  |
| Radiotherapy                               |     |                  |
| Done                                       | 104 | 82.5             |
| Not done                                   | 19  | 15.1             |
| Unknown                                    | 3   | 2.4              |
| <hr/>                                      |     |                  |
| Target therapy                             |     |                  |
| Done                                       | 7   | 5.6              |
| Not done                                   | 116 | 92.1             |
| Unknown                                    | 3   | 2.4              |
| <hr/>                                      |     |                  |
| Anti-hormonal therapy                      |     |                  |
| Done                                       | 89  | 70.6             |
| Not done                                   | 33  | 26.2             |
| Unknown                                    | 4   | 3.2              |
| <hr/>                                      |     |                  |
| Follow-up periods (median, range (months)) |     | 94.3 (4.0-254.3) |
| <hr/>                                      |     |                  |
| Recurrence                                 |     |                  |
| Yes                                        | 37  | 29.4             |
| No                                         | 86  | 68.3             |
| Unknown                                    | 3   | 2.4              |
| <hr/>                                      |     |                  |
| Death                                      |     |                  |
| Yes                                        | 17  | 13.5             |
| No                                         | 109 | 86.5             |
| <hr/>                                      |     |                  |

LA: luminal A, LB: luminal B, TNBC: triple-negative breast cancer, BCS: breast-conserving surgery
